# Supplementary material
Source: publisher site journal article supplement (https://www.dovepress.com/article/284212)
Supplement: Supplementary file 1 [file get_supplementary_file.php]

Supplementary Table 1. The Delta CT value of PCR of included patients. The expression of miR-765 in 126 pairs of tumor tissues and adjacent normal tissues was determined in triplicate

|  | △CT | |
| --- | --- | --- |
|  | tumor tissues | normal tissues |
| 1 | 9.92 | 7.82 |
| 2 | 8.68 | 9.34 |
| 3 | 11.90 | 9.03 |
| 4 | 8.13 | 13.83 |
| 5 | 11.22 | 13.82 |
| 6 | 10.98 | 14.14 |
| 7 | 8.36 | 9.32 |
| 8 | 9.69 | 7.50 |
| 9 | 8.50 | 9.79 |
| 10 | 10.68 | 9.36 |
| 11 | 8.22 | 6.37 |
| 12 | 7.42 | 6.40 |
| 13 | 9.30 | 9.88 |
| 14 | 9.82 | 7.31 |
| 15 | 11.71 | 9.73 |
| 16 | 9.31 | 9.49 |
| 17 | 7.54 | 6.91 |
| 18 | 8.31 | 8.81 |
| 19 | 9.91 | 7.42 |
| 20 | 10.98 | 8.93 |
| 21 | 10.72 | 9.89 |
| 22 | 8.33 | 9.56 |
| 23 | 7.47 | 10.34 |
| 24 | 9.28 | 9.56 |
| 25 | 7.17 | 6.06 |
| 26 | 10.21 | 7.29 |
| 27 | 10.60 | 8.33 |
| 28 | 7.55 | 6.67 |
| 29 | 8.51 | 5.31 |
| 30 | 10.41 | 8.16 |
| 31 | 11.53 | 7.33 |
| 32 | 9.59 | 8.73 |
| 33 | 10.77 | 9.87 |
| 34 | 8.60 | 6.90 |
| 35 | 10.31 | 6.75 |
| 36 | 8.73 | 9.62 |
| 37 | 8.44 | 8.27 |
| 38 | 9.16 | 6.44 |
| 39 | 8.12 | 6.05 |
| 40 | 9.88 | 6.10 |
| 41 | 9.27 | 5.96 |
| 42 | 9.35 | 7.66 |
| 43 | 11.69 | 7.52 |
| 44 | 9.66 | 8.19 |
| 45 | 11.55 | 8.99 |
| 46 | 10.72 | 5.65 |
| 47 | 12.05 | 6.93 |
| 48 | 11.34 | 8.79 |
| 49 | 9.52 | 7.16 |
| 50 | 8.41 | 8.61 |
| 51 | 9.77 | 8.80 |
| 52 | 10.39 | 8.58 |
| 53 | 11.91 | 9.69 |
| 54 | 11.89 | 9.59 |
| 55 | 11.19 | 7.88 |
| 56 | 8.97 | 10.39 |
| 57 | 9.03 | 8.87 |
| 58 | 7.91 | 6.35 |
| 59 | 9.85 | 9.18 |
| 60 | 11.54 | 5.93 |
| 61 | 11.66 | 5.24 |
| 62 | 8.68 | 5.12 |
| 63 | 8.37 | 6.78 |
| 64 | 10.60 | 17.22 |
| 65 | 10.33 | 16.34 |
| 66 | 10.14 | 16.30 |
| 67 | 10.97 | 8.87 |
| 68 | 10.62 | 6.45 |
| 69 | 11.64 | 8.11 |
| 70 | 8.58 | 9.04 |
| 71 | 9.09 | 7.04 |
| 72 | 8.04 | 9.31 |
| 73 | 11.34 | 10.35 |
| 74 | 9.89 | 7.18 |
| 75 | 12.00 | 8.92 |
| 76 | 9.23 | 11.21 |
| 77 | 8.36 | 9.85 |
| 78 | 7.77 | 10.56 |
| 79 | 8.38 | 7.17 |
| 80 | 10.71 | 6.85 |
| 81 | 11.07 | 7.04 |
| 82 | 9.36 | 4.60 |
| 83 | 8.58 | 4.48 |
| 84 | 9.95 | 6.92 |
| 85 | 10.75 | 6.37 |
| 86 | 11.55 | 9.59 |
| 87 | 9.79 | 7.21 |
| 88 | 8.43 | 5.71 |
| 89 | 10.56 | 8.24 |
| 90 | 11.38 | 7.72 |
| 91 | 11.13 | 6.24 |
| 92 | 8.78 | 5.86 |
| 93 | 10.06 | 8.35 |
| 94 | 9.77 | 8.34 |
| 95 | 10.89 | 9.05 |
| 96 | 10.32 | 6.43 |
| 97 | 11.17 | 0.11 |
| 98 | 8.50 | 0.35 |
| 99 | 10.78 | 1.14 |
| 100 | 11.26 | 9.56 |
| 101 | 9.26 | 8.11 |
| 102 | 9.86 | 9.78 |
| 103 | 11.91 | 9.43 |
| 104 | 10.93 | 9.76 |
| 105 | 8.50 | 9.93 |
| 106 | 10.35 | 7.04 |
| 107 | 10.90 | 7.38 |
| 108 | 10.05 | 9.33 |
| 109 | 11.63 | 6.59 |
| 110 | 8.71 | 6.16 |
| 111 | 11.57 | 5.10 |
| 112 | 11.22 | 6.70 |
| 113 | 10.46 | 8.73 |
| 114 | 8.64 | 6.39 |
| 115 | 9.08 | 9.79 |
| 116 | 11.35 | 10.56 |
| 117 | 10.08 | 9.67 |
| 118 | 7.21 | 0.21 |
| 119 | 10.41 | 0.20 |
| 120 | 7.39 | 0.26 |
| 121 | 7.30 | 7.14 |
| 122 | 10.58 | 6.65 |
| 123 | 8.71 | 8.33 |
| 124 | 9.86 | 1.46 |
| 125 | 9.57 | 0.92 |
| 126 | 10.56 | 1.12 |
| 127 | 8.65 | 7.91 |
| 128 | 7.59 | 9.72 |
| 129 | 10.43 | 9.81 |
| 130 | 10.82 | 0.16 |
| 131 | 12.27 | 0.67 |
| 132 | 9.13 | 0.63 |
| 133 | 8.71 | 6.44 |
| 134 | 10.16 | 7.44 |
| 135 | 7.14 | 8.00 |
| 136 | 10.14 | 4.98 |
| 137 | 7.77 | 6.30 |
| 138 | 9.33 | 6.62 |
| 139 | 11.67 | 8.79 |
| 140 | 10.19 | 7.86 |
| 141 | 11.18 | 7.93 |
| 142 | 10.83 | 7.55 |
| 143 | 10.23 | 8.24 |
| 144 | 10.10 | 10.20 |
| 145 | 7.96 | 8.84 |
| 146 | 11.31 | 9.74 |
| 147 | 8.86 | 9.63 |
| 148 | 8.83 | 5.98 |
| 149 | 9.98 | 8.42 |
| 150 | 11.07 | 7.23 |
| 151 | 7.04 | 8.35 |
| 152 | 9.69 | 9.86 |
| 153 | 6.84 | 9.65 |
| 154 | 10.02 | 7.04 |
| 155 | 11.07 | 8.17 |
| 156 | 9.63 | 9.65 |
| 157 | 10.75 | 10.10 |
| 158 | 7.88 | 8.62 |
| 159 | 11.07 | 9.20 |
| 160 | 11.17 | 7.21 |
| 161 | 9.86 | 6.62 |
| 162 | 10.25 | 6.95 |
| 163 | 8.39 | 8.04 |
| 164 | 10.86 | 10.29 |
| 165 | 10.93 | 10.04 |
| 166 | 7.37 | 7.10 |
| 167 | 7.98 | 6.08 |
| 168 | 10.99 | 4.99 |
| 169 | 7.79 | 7.62 |
| 170 | 7.73 | 8.24 |
| 171 | 11.12 | 9.55 |
| 172 | 9.58 | 6.73 |
| 173 | 8.52 | 6.99 |
| 174 | 10.14 | 6.62 |
| 175 | 9.87 | 7.10 |
| 176 | 8.21 | 5.69 |
| 177 | 8.32 | 8.51 |
| 178 | 11.80 | 6.59 |
| 179 | 12.23 | 7.44 |
| 180 | 10.10 | 8.75 |
| 181 | 10.73 | 7.93 |
| 182 | 9.61 | 10.37 |
| 183 | 7.28 | 9.22 |
| 184 | 9.69 | 8.30 |
| 185 | 9.08 | 7.44 |
| 186 | 10.09 | 8.64 |
| 187 | 8.01 | 8.51 |
| 188 | 7.08 | 6.42 |
| 189 | 6.80 | 8.67 |
| 190 | 7.73 | 6.66 |
| 191 | 7.33 | 7.65 |
| 192 | 7.65 | 7.96 |
| 193 | 11.19 | 9.38 |
| 194 | 9.19 | 9.32 |
| 195 | 11.40 | 8.31 |
| 196 | 28.32 | 25.17 |
| 197 | 28.64 | 26.45 |
| 198 | 28.58 | 26.78 |
| 199 | 7.56 | 6.66 |
| 200 | 7.48 | 9.49 |
| 201 | 10.14 | 6.21 |
| 202 | 8.61 | 6.99 |
| 203 | 10.03 | 6.97 |
| 204 | 11.63 | 6.18 |
| 205 | 10.32 | 8.02 |
| 206 | 9.74 | 7.29 |
| 207 | 10.50 | 9.07 |
| 208 | 7.08 | 8.29 |
| 209 | 10.21 | 10.19 |
| 210 | 9.45 | 9.35 |
| 211 | 10.30 | 5.32 |
| 212 | 7.60 | 6.74 |
| 213 | 8.12 | 6.89 |
| 214 | 7.78 | 4.97 |
| 215 | 8.54 | 5.08 |
| 216 | 10.05 | 6.84 |
| 217 | 9.24 | 6.49 |
| 218 | 10.79 | 7.29 |
| 219 | 10.93 | 5.65 |
| 220 | 9.14 | 6.27 |
| 221 | 10.70 | 7.68 |
| 222 | 10.07 | 6.95 |
| 223 | 10.40 | 8.26 |
| 224 | 7.78 | 10.63 |
| 225 | 9.34 | 7.37 |
| 226 | 10.30 | 10.27 |
| 227 | 11.97 | 10.56 |
| 228 | 12.40 | 9.05 |
| 229 | 9.83 | 10.20 |
| 230 | 8.47 | 7.29 |
| 231 | 10.59 | 6.66 |
| 232 | 7.73 | 5.17 |
| 233 | 10.60 | 8.20 |
| 234 | 8.26 | 6.95 |
| 235 | 9.26 | 7.68 |
| 236 | 11.33 | 9.74 |
| 237 | 10.66 | 8.60 |
| 238 | 9.40 | 8.63 |
| 239 | 8.77 | 9.23 |
| 240 | 10.21 | 9.04 |
| 241 | 8.67 | 8.27 |
| 242 | 9.34 | 5.29 |
| 243 | 9.05 | 5.35 |
| 244 | 11.90 | 2.23 |
| 245 | 10.80 | 1.74 |
| 246 | 9.07 | 0.36 |
| 247 | 11.81 | 8.46 |
| 248 | 9.15 | 8.71 |
| 249 | 11.65 | 6.35 |
| 250 | 7.92 | 0.78 |
| 251 | 10.39 | 0.14 |
| 252 | 11.07 | 1.98 |
| 253 | 8.25 | 7.23 |
| 254 | 8.81 | 9.34 |
| 255 | 11.39 | 9.69 |
| 256 | 8.17 | 6.72 |
| 257 | 9.49 | 8.13 |
| 258 | 10.18 | 5.81 |
| 259 | 7.32 | 9.20 |
| 260 | 8.00 | 6.59 |
| 261 | 8.11 | 5.96 |
| 262 | 8.78 | 9.44 |
| 263 | 7.60 | 10.79 |
| 264 | 10.99 | 8.32 |
| 265 | 11.43 | 4.53 |
| 266 | 8.70 | 3.56 |
| 267 | 10.44 | 5.67 |
| 268 | 8.79 | 7.56 |
| 269 | 10.01 | 7.79 |
| 270 | 9.04 | 6.02 |
| 271 | 8.07 | 2.67 |
| 272 | 8.97 | 1.54 |
| 273 | 7.87 | 0.29 |
| 274 | 7.34 | 8.79 |
| 275 | 9.43 | 8.78 |
| 276 | 7.72 | 8.23 |
| 277 | 11.38 | 10.46 |
| 278 | 8.62 | 9.68 |
| 279 | 12.16 | 9.60 |
| 280 | 11.13 | 8.48 |
| 281 | 9.89 | 6.36 |
| 282 | 9.32 | 8.24 |
| 283 | 11.74 | 0.81 |
| 284 | 11.73 | 2.65 |
| 285 | 9.23 | 3.24 |
| 286 | 11.10 | 8.43 |
| 287 | 9.51 | 7.52 |
| 288 | 9.67 | 8.85 |
| 289 | 7.07 | 7.93 |
| 290 | 10.21 | 7.04 |
| 291 | 9.07 | 5.44 |
| 292 | 7.82 | 9.86 |
| 293 | 11.65 | 8.44 |
| 294 | 9.44 | 8.54 |
| 295 | 9.64 | 9.38 |
| 296 | 10.59 | 9.69 |
| 297 | 8.73 | 8.82 |
| 298 | 10.26 | 7.86 |
| 299 | 8.90 | 6.90 |
| 300 | 11.48 | 5.16 |
| 301 | 10.52 | 7.38 |
| 302 | 11.42 | 8.86 |
| 303 | 9.53 | 7.67 |
| 304 | 9.87 | 6.56 |
| 305 | 9.75 | 6.94 |
| 306 | 10.42 | 6.16 |
| 307 | 11.19 | 8.04 |
| 308 | 9.78 | 9.93 |
| 309 | 11.02 | 7.73 |
| 310 | 8.49 | 7.51 |
| 311 | 9.29 | 9.67 |
| 312 | 8.63 | 8.26 |
| 313 | 8.14 | 10.30 |
| 314 | 10.35 | 11.64 |
| 315 | 8.80 | 9.04 |
| 316 | 7.47 | 6.79 |
| 317 | 11.75 | 5.97 |
| 318 | 7.58 | 7.88 |
| 319 | 8.86 | 6.99 |
| 320 | 10.34 | 7.79 |
| 321 | 10.84 | 7.90 |
| 322 | 9.37 | 7.01 |
| 323 | 8.31 | 7.65 |
| 324 | 11.53 | 9.14 |
| 325 | 9.90 | 7.92 |
| 326 | 10.92 | 8.70 |
| 327 | 11.45 | 9.29 |
| 328 | 9.67 | 8.27 |
| 329 | 10.88 | 9.77 |
| 330 | 10.40 | 7.85 |
| 331 | 10.12 | 7.94 |
| 332 | 10.39 | 8.85 |
| 333 | 8.06 | 8.22 |
| 334 | 10.79 | 7.90 |
| 335 | 8.66 | 10.94 |
| 336 | 7.18 | 8.55 |
| 337 | 12.26 | 6.71 |
| 338 | 12.04 | 5.94 |
| 339 | 11.97 | 6.76 |
| 340 | 9.45 | 7.66 |
| 341 | 8.73 | 7.83 |
| 342 | 12.13 | 7.71 |
| 343 | 11.10 | 5.97 |
| 344 | 11.67 | 8.26 |
| 345 | 10.21 | 8.81 |
| 346 | 9.29 | 6.63 |
| 347 | 12.35 | 9.00 |
| 348 | 9.48 | 8.50 |
| 349 | 11.87 | 7.30 |
| 350 | 9.69 | 9.81 |
| 351 | 8.40 | 7.70 |
| 352 | 7.53 | 8.73 |
| 353 | 8.02 | 6.33 |
| 354 | 7.69 | 6.20 |
| 355 | 10.80 | 7.41 |
| 356 | 8.89 | 6.05 |
| 357 | 8.08 | 6.29 |
| 358 | 11.51 | 4.94 |
| 359 | 11.34 | 4.62 |
| 360 | 12.11 | 7.76 |
| 361 | 10.90 | 8.27 |
| 362 | 8.97 | 5.97 |
| 363 | 9.90 | 7.85 |
| 364 | 7.39 | 8.33 |
| 365 | 7.00 | 9.68 |
| 366 | 9.74 | 8.62 |
| 367 | 7.55 | 6.51 |
| 368 | 10.94 | 6.55 |
| 369 | 10.74 | 8.18 |
| 370 | 8.69 | -1.35 |
| 371 | 10.53 | -1.30 |
| 372 | 9.61 | -1.12 |
| 373 | 9.46 | 6.60 |
| 374 | 9.18 | 6.32 |
| 375 | 11.48 | 8.42 |
| 376 | 11.23 | 6.82 |
| 377 | 12.07 | 9.61 |
| 378 | 9.53 | 7.47 |

| Potential targets | Gene name |
| --- | --- |
| BMP6 | Bone morphogenetic protein 6 |
| INPP4B | Inositol polyphosphate-4-phosphatase, type II |
| MTUS1 | Microtubule associated tumor suppressor 1 |
| ING4 | Inhibitor of growth family, member 4 |
| PLP2 | Proteolipid protein 2 |
| SOX6 | Sex determining region Y-box 6 |
| PDX1 | Pancreatic and duodenal homeobox 1 |
| CLPSL 1 | Colipase-like 1 |
| NRBP 2 | Nuclear receptor binding protein 2 |
| PCDHGB3 | Protocadherin gamma subfamily B, 3 |
| RUNX1T1 | Runt-related transcription factor 1 |
| CD4 | CD4 molecule |

**Supplementary Table 2.** The potential targets of miR-765

| Potential targets | Gene name |
| --- | --- |
| BMP6 | Bone morphogenetic protein 6 |
| INPP4B | Inositol polyphosphate-4-phosphatase, type II |
| MTUS1 | Microtubule associated tumor suppressor 1 |
| ING4 | Inhibitor of growth family, member 4 |
| PLP2 | Proteolipid protein 2 |
| SOX6 | Sex determining region Y-box 6 |
| PDX1 | Pancreatic and duodenal homeobox 1 |
| CLPSL 1 | Colipase-like 1 |
| NRBP 2 | Nuclear receptor binding protein 2 |
| PCDHGB3 | Protocadherin gamma subfamily B, 3 |
| RUNX1T1 | Runt-related transcription factor 1 |
| CD4 | CD4 molecule |
